# Supplementary material for: Alluaudite Na2Co2Fe(PO4)3as an electroactive material for sodium ion batteries
Source: Royal Society of Chemistry journal article supplement (doi:10.1039/c5dt00971e), 2015-01-01
Supplement: c5dt00971e1.pdf [file c5dt00971e1.pdf]

ARTICLE

## Alluaudite $\text{Na}_2\text{Co}_2\text{Fe}(\text{PO}_4)_3$ as electroactive material for sodium ion batteries

Cite this: DOI: 10.1039/x0xx00000x

R. Essehli,<sup>a,\*</sup> I. Belharouak,<sup>a,\*</sup> H. Ben Yahia,<sup>a,\*</sup> K. Maher,<sup>a</sup> A. Abouimrane,<sup>a</sup> B. Orayech,<sup>b</sup> S. Calder,<sup>c</sup> X. L. Zhou,<sup>d</sup> Z. Zhou,<sup>d</sup> and Y-K. Sun.<sup>e</sup>

Received 00th January 2012,

Accepted 00th January 2012

DOI: 10.1039/x0xx00000x

www.rsc.org/

### Supplementary information

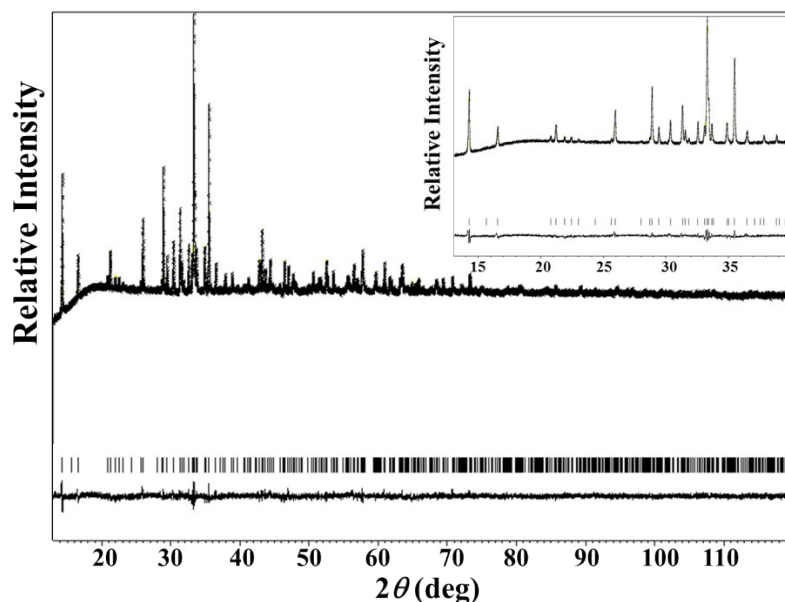

**Fig. S1.** Final observed, calculated and difference plots for PXRD ( $\text{Cu-K}\alpha$  radiation) refinement of  $\text{Na}_2\text{Co}_2\text{Fe}(\text{PO}_4)_3$ .

The inset corresponds to a zoom of the  $2\theta = 13$  to  $40^\circ$  area.

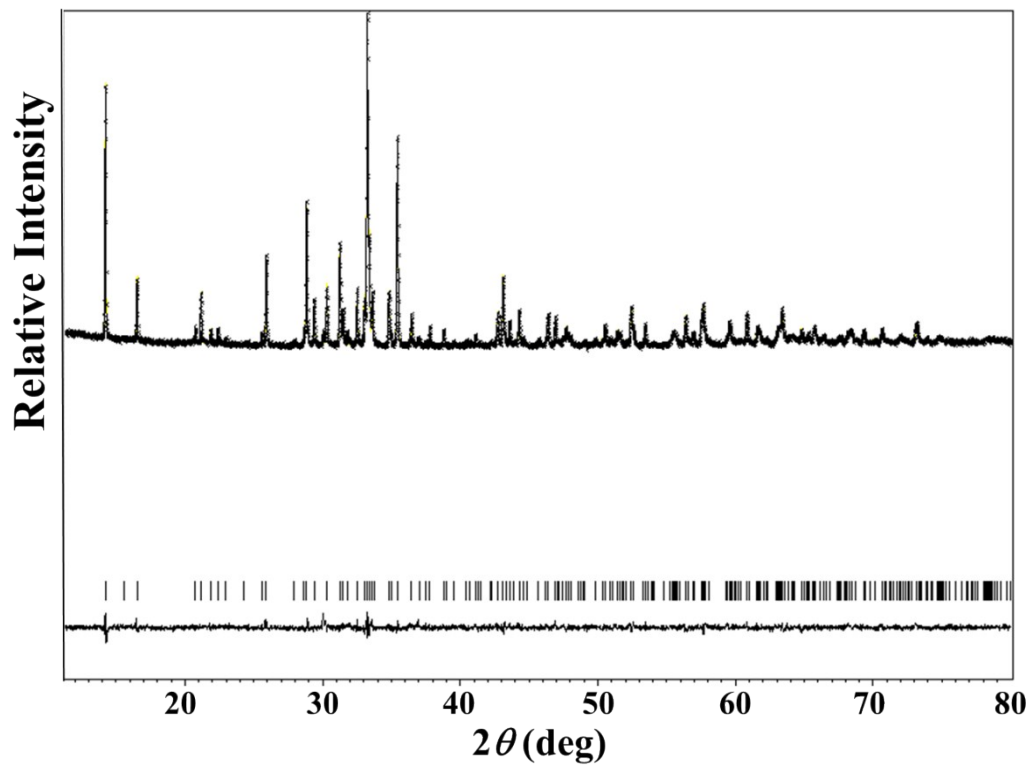

Fig. S2. Final observed, calculated and difference plots for PXR D ( $\text{Cu-K}_\alpha$  radiation) refinement of  $\text{Na}_3\text{Co}_2\text{Fe}(\text{PO}_4)_3$ .
